# Supplementary material for: Neural correlates of multi-day learning and savings in sensorimotor adaptation
Source: PubMed Central journal article supplement (PMC6155344; doi:10.1038/s41598-018-32689-4), 2018-09-24

*Supplementary Material*

**Neural correlates of multi-day learning and savings in sensorimotor adaptation**

M.F.L. Ruitenber<sup>1,a</sup>, V. Koppelmans<sup>1,b</sup>, Y.E. De Dios<sup>2</sup>, N.E. Gadd<sup>2</sup>, S.J. Wood<sup>3</sup>, P.A. Reuter-Lorenz<sup>4</sup>, I. Kofman<sup>2</sup>, J.J. Bloomberg<sup>3</sup>, A.P. Mulavara<sup>2</sup>, & R.D Seidler<sup>1,4,c\*</sup>

<sup>1</sup> School of Kinesiology, University of Michigan, Ann Arbor, MI, USA.

<sup>2</sup> KBRwyle Science, Technology, and Engineering Group, Houston, TX, USA.

<sup>3</sup> NASA Johnson Space Center, Houston, TX, USA.

<sup>4</sup> Department of Psychology, University of Michigan, Ann Arbor, MI, USA.

Current affiliations:

<sup>a</sup> Department of Experimental Psychology, Ghent University, Ghent, Belgium

<sup>b</sup> Department of Psychiatry, University of Utah, Salt Lake City, UT, USA

<sup>c</sup> Department of Applied Physiology & Kinesiology, University of Florida, Gainesville, FL, USA

\* Corresponding author:

Rachael Seidler

University of Florida, Department of Applied Physiology & Kinesiology

1864 Stadium Road, Gainesville, FL 32611-8205, USA

Telephone: +1 (352) 294-1722

Email: rachaelseidler@ufl.edu

**Supplementary Figure S1.** Exemplary single subject data and fitted exponential decay functions for the early and late adaptation phases.

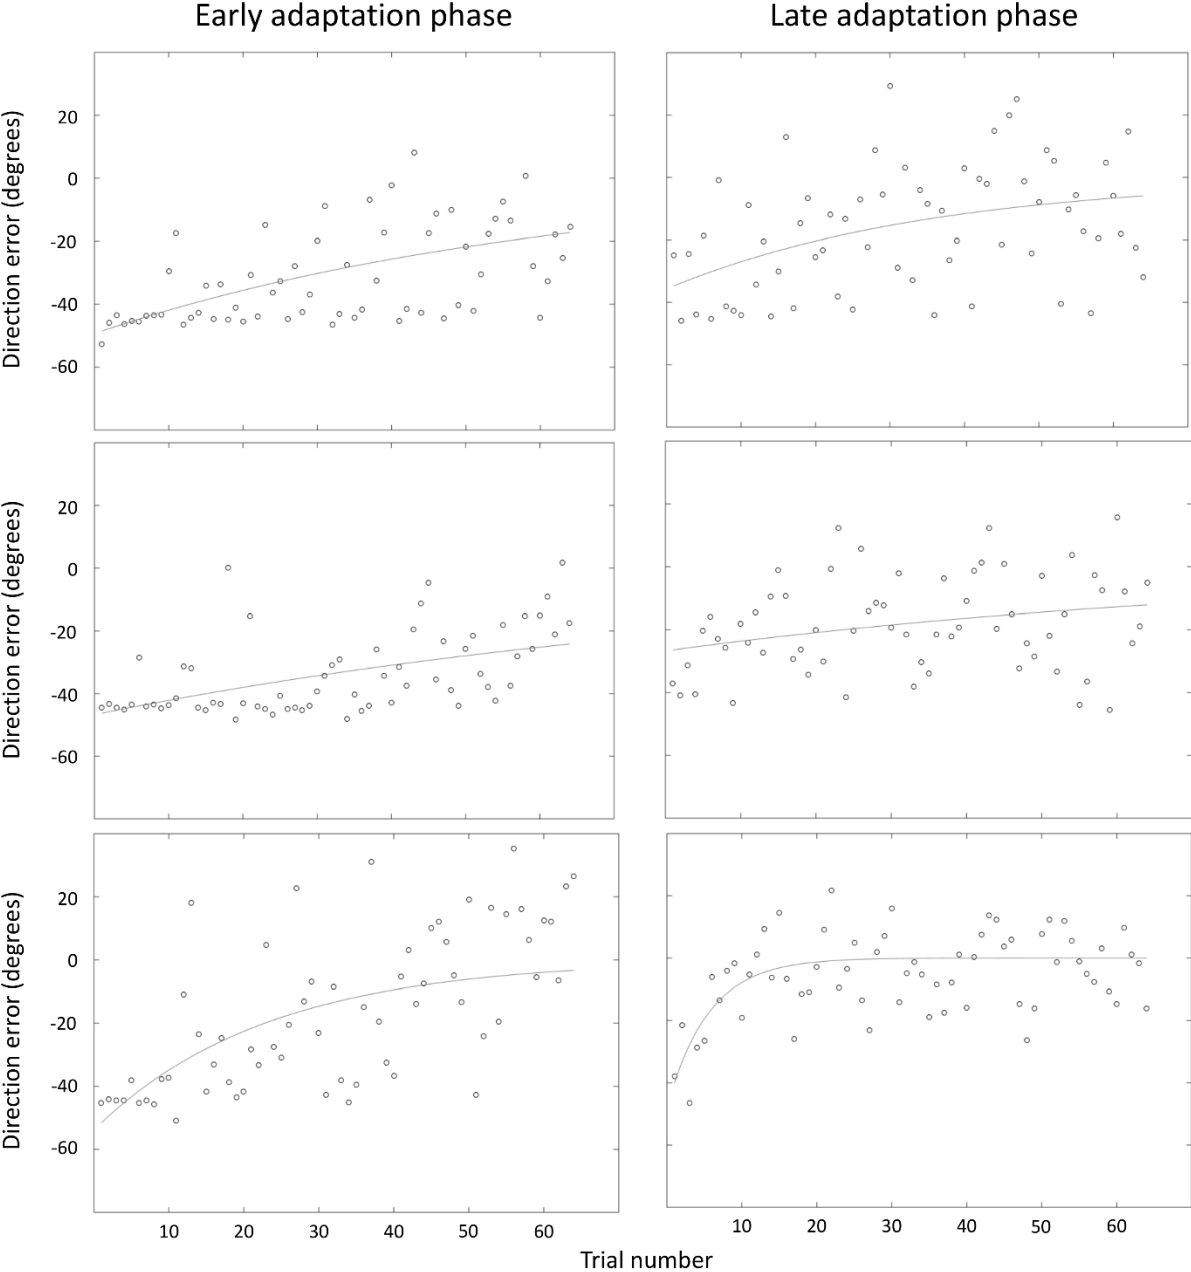

Supplement: 41598_2018_32689_MOESM1_ESM.pdf [file 41598_2018_32689_MOESM1_ESM.pdf]
